# Supplementary material for: Rapid Functional Drug Screening of Passage-Zero Patient Brain Tumor Tissues Ex Vivo: Results from a Clinical Feasibility Study
Source: Research Square preprint supplement (doi:10.21203/rs.3.rs-7993619/v1), 2025-11-04
Supplement: Supplementary file 1 [file bd98a42fff99ee771d80e241.pdf]

Supplemental Table 1: Patient Characteristics

| Patient ID | Tissue Type                                                                 | Occurrence                  | Tumor Category       | Age | Race            | Gender | Received Any Sort of Treatment Pre Surgery |
|------------|-----------------------------------------------------------------------------|-----------------------------|----------------------|-----|-----------------|--------|--------------------------------------------|
| 101        | Metastatic poorly differentiated squamous cell carcinoma from lung to brain | Metastatic Tumor            | Adult Metastatic     | 60  | White           | Male   | Yes                                        |
| 102        | Metastatic HER2-positive breast carcinoma to brain                          | Metastatic Tumor            | Adult Metastatic     | 44  | White           | Female | Yes                                        |
| 103        | Metastatic poorly differentiated adenocarcinoma from lung to brain          | Metastatic Tumor            | Adult Metastatic     | 70  | White           | Female | Yes                                        |
| 104        | Tissue Not Obtained - No Remaining Tissue                                   |                             |                      |     |                 |        |                                            |
| 105        | Tissue Not Obtained - After Hours Surgery                                   |                             |                      |     |                 |        |                                            |
| 106        | Meningioma, CNS WHO grade 2                                                 | Primary Tumor               | Adult Low-Grade      | 49  | Hispanic/latino | Female | No                                         |
| 107        | Tissue Not Obtained - After Hours Surgery                                   |                             |                      |     |                 |        |                                            |
| 108        | Astrocytoma, IDH-mutant, CNS WHO grade 4                                    | Recurrent Tumor             | Adult High-Grade     | 39  | White           | Male   | Yes                                        |
| 109        | Low-grade glioneuronal tumor, not otherwise specified (NOS)                 | Primary Tumor               | Adult Low-Grade      | 25  | White           | Female | No                                         |
| 110        | Tissue Not Obtained - After Hours Surgery                                   |                             |                      |     |                 |        |                                            |
| 111        | Meningioma, CNS WHO grade 1                                                 | Primary Tumor               | Adult Low-Grade      | 48  | White           | Female | No                                         |
| 112        | Tissue Not Obtained - After Hours Surgery                                   |                             |                      |     |                 |        |                                            |
| 113        | Glioblastoma IDH-wildtype CNS WHO grade 4                                   | Primary and Recurrent Tumor | Adult High-Grade     | 70  | Black           | Male   | No                                         |
| 114        | Tissue Not Obtained - After Hours Surgery                                   |                             |                      |     |                 |        |                                            |
| 115        | Pilocytic astrocytoma, CNS WHO grade 1                                      | Primary Tumor               | Pediatric Low-Grade  | 6   | White           | Male   | No                                         |
| 116        | Tissue Not Obtained - No Remaining Tissue                                   |                             |                      |     |                 |        |                                            |
| 117        | Tissue Not Obtained - After Hours Surgery                                   |                             |                      |     |                 |        |                                            |
| 118        | Tissue Not Obtained - After Hours Surgery                                   |                             |                      |     |                 |        |                                            |
| 119        | Metastatic squamous cell carcinoma of lung to brain                         | Metastatic Tumor            | Adult Metastatic     | 78  | Black           | Male   | No                                         |
| 120        | Metastatic breast carcinoma to brain, ER-positive, HER2-equivocal           | Metastatic Tumor            | Adult Metastatic     | 75  | White           | Female | Yes                                        |
| 121        | Tissue Not Obtained - No Remaining Tissue                                   |                             |                      |     |                 |        |                                            |
| 122        | Astrocytoma, IDH-mutant, CNS WHO grade 3                                    | Primary Tumor               | Adult High-Grade     | 54  | White           | Male   | No                                         |
| 123        | Glioblastoma IDH-wildtype CNS WHO grade 4                                   | Recurrent Tumor             | Adult High-Grade     | 57  | Hispanic/latino | Female | Yes                                        |
| 124        | Glioblastoma IDH-wildtype CNS WHO grade 4                                   | Primary Tumor               | Adult High-Grade     | 53  | White           | Male   | No                                         |
| 125        | Glioblastoma IDH-wildtype CNS WHO grade 4                                   | Primary Tumor               | Adult High-Grade     | 45  | White           | Male   | No                                         |
| 126        | Glioblastoma IDH-wildtype CNS WHO grade 4                                   | Primary Tumor               | Adult High-Grade     | 77  | Black           | Female | No                                         |
| 127        | Metastatic triple-negative breast carcinoma to brain                        | Metastatic Tumor            | Adult Metastatic     | 55  | White           | Female | Yes                                        |
| 128        | Glioblastoma IDH-wildtype CNS WHO grade 4                                   | Primary Tumor               | Adult High-Grade     | 68  | White           | Female | No                                         |
| 129        | Tissue Not Obtained - Patient Removed from Study Prior to Surgery           |                             |                      |     |                 |        |                                            |
| 130        | Tissue Not Obtained - No Remaining Tissue                                   |                             |                      |     |                 |        |                                            |
| 131        | Tissue Not Obtained - Patient Removed from Study Prior to Surgery           |                             |                      |     |                 |        |                                            |
| 132        | Tissue Not Obtained - After Hours Surgery                                   |                             |                      |     |                 |        |                                            |
| 133        | Glioblastoma IDH-wildtype CNS WHO grade 4                                   | Primary Tumor               | Adult High-Grade     | 80  | White           | Male   | No                                         |
| 134        | Tissue Not Obtained - After Hours Surgery                                   |                             |                      |     |                 |        |                                            |
| 135        | Tissue Not Obtained - After Hours Surgery                                   |                             |                      |     |                 |        |                                            |
| 136        | Tissue Not Obtained - After Hours Surgery                                   |                             |                      |     |                 |        |                                            |
| 137        | Tissue Not Obtained - After Hours Surgery                                   |                             |                      |     |                 |        |                                            |
| 138        | Glioblastoma IDH-wildtype CNS WHO grade 4                                   | Recurrent Tumor             | Adult High-Grade     | 52  | Black           | Male   | No                                         |
| 139        | Tissue Not Obtained - After Hours Surgery                                   |                             |                      |     |                 |        |                                            |
| 140        | Glioblastoma, IDH-wildtype, CNS WHO grade 4                                 | Recurrent Tumor             | Adult High-Grade     | 62  | White           | Female | Yes                                        |
| 141        | Radiation necrosis                                                          | Metastatic Tumor            | Pseudoprogression    | 61  | Black           | Male   | Yes                                        |
| 142        | Posterior fossa ependymoma group PFA CNS WHO grade 3                        | Primary Tumor               | Pediatric High-Grade | 1   | Black, Filipino | Male   | No                                         |
| 143        | Pleomorphic xanthoastrocytoma, BRAF V600E-mutant, CNS WHO grade 2           | Primary Tumor               | Pediatric High-Grade | 8   | Black           | Female | No                                         |
| 144        | Astrocytoma, IDH-mutant, CNS WHO grade 4                                    | Recurrent Tumor             | Adult High-Grade     | 21  | Black           | Male   | Yes                                        |
| 145        | Tissue Not Obtained - After Hours Surgery                                   |                             |                      |     |                 |        |                                            |
| 146        | Tissue Not Obtained - No Remaining Tissue                                   |                             |                      |     |                 |        |                                            |
| 147        | Metastatic ovarian carcinoma to brain                                       | Metastatic Tumor            | Adult Metastatic     | 52  | White           | Female | Yes                                        |
| 148        | Tissue Not Obtained - After Hours Surgery                                   |                             |                      |     |                 |        |                                            |
| 149        | Tissue Not Obtained - No Remaining Tissue                                   |                             |                      |     |                 |        |                                            |
| 150        | Atypical teratoid/rhabdoid tumor CNS WHO grade 4                            | Primary Tumor               | Pediatric High-Grade | 5   | Asian Indian    | Male   | No                                         |
| 151        | Medulloblastoma, SHH-activated and TP53-wildtype, CNS WHO grade 4           | Primary Tumor               | Pediatric High-Grade | 18  | Hispanic/Latino | Female | No                                         |
| 152        | Glioblastoma IDH-wildtype CNS WHO grade 4                                   | Recurrent Tumor             | Adult High-Grade     | 65  | White           | Female | Yes                                        |
| 153        | Glioblastoma, IDH-wildtype, BRAF V600E-mutant, CNS WHO grade 4              | Recurrent Tumor             | Adult High-Grade     | 48  | White           | Male   | Yes                                        |
| 154        | Tissue Not Obtained - After Hours Surgery                                   |                             |                      |     |                 |        |                                            |
| 155        | Medulloblastoma, SHH-activated and TP53-wildtype, CNS WHO grade 4           | Primary Tumor               | Pediatric High-Grade | 4   | White           | Male   | No                                         |
| 156        | Tissue Not Obtained - Tissue Designated to Interventional Trial             |                             |                      |     |                 |        |                                            |
| 157        | Metastatic melanoma to brain                                                | Metastatic Tumor            | Adult Metastatic     | 69  | White           | Female | No                                         |
| 158        | Glioblastoma IDH-wildtype CNS WHO grade 4                                   | Primary Tumor               | Adult High-Grade     | 68  | White           | Male   | No                                         |
| 159        | Pilocytic astrocytoma, CNS WHO grade 1, BRAF -KIAA1549 fusion-positive      | Primary Tumor               | Pediatric Low-Grade  | 8   | White           | Female | No                                         |
| 160        | Atypical teratoid/rhabdoid tumor CNS WHO grade 4                            | Primary Tumor               | Pediatric High-Grade | 1   | White           | Male   | No                                         |

Supplemental Figure 1: High Mag Images of 5-ALA Fluorescence

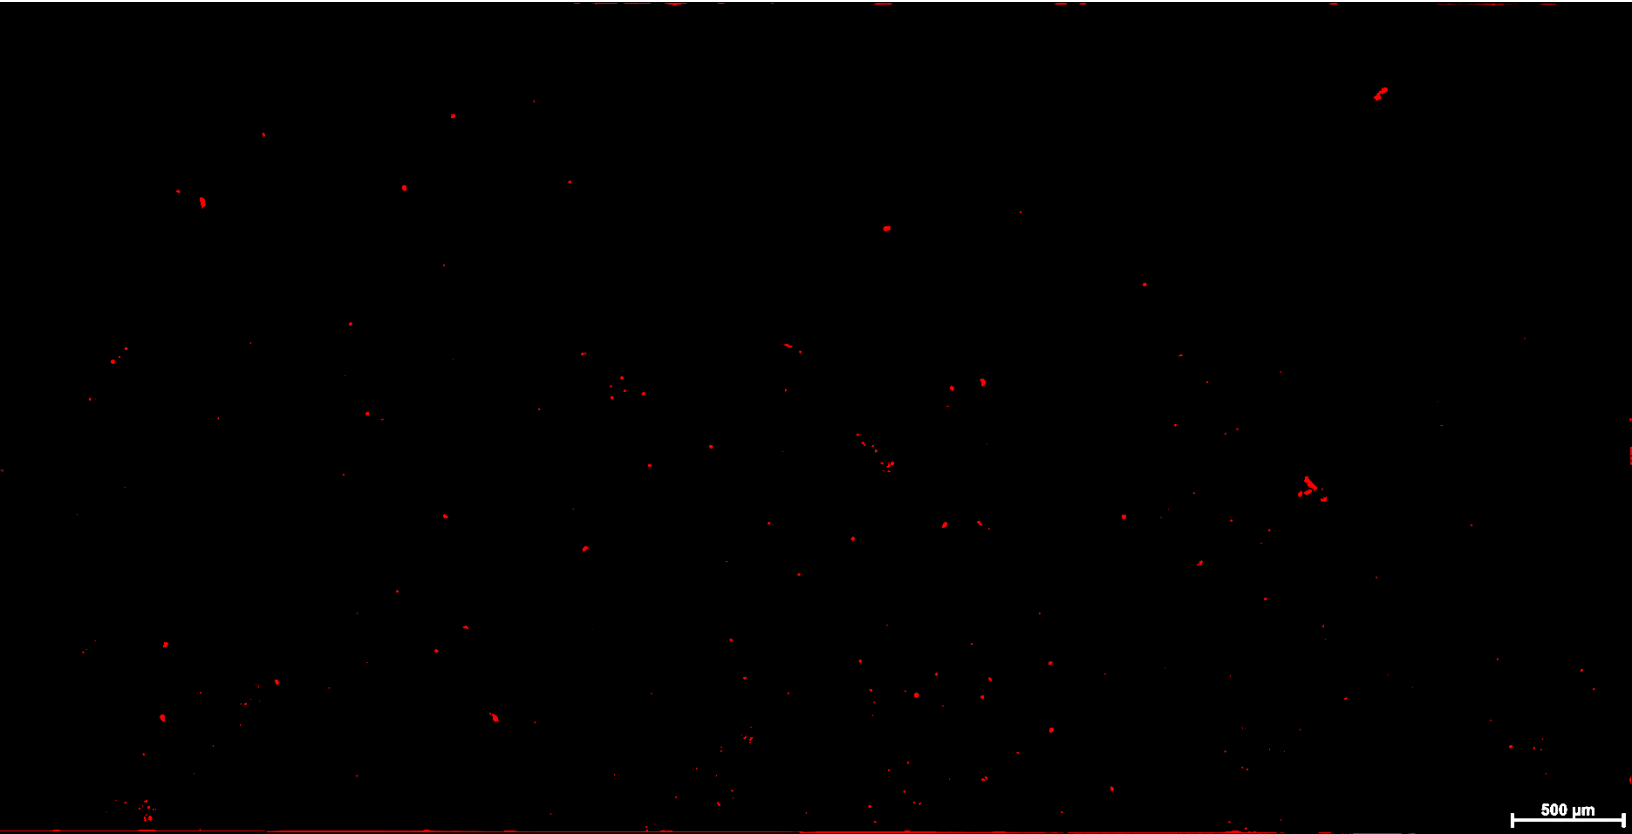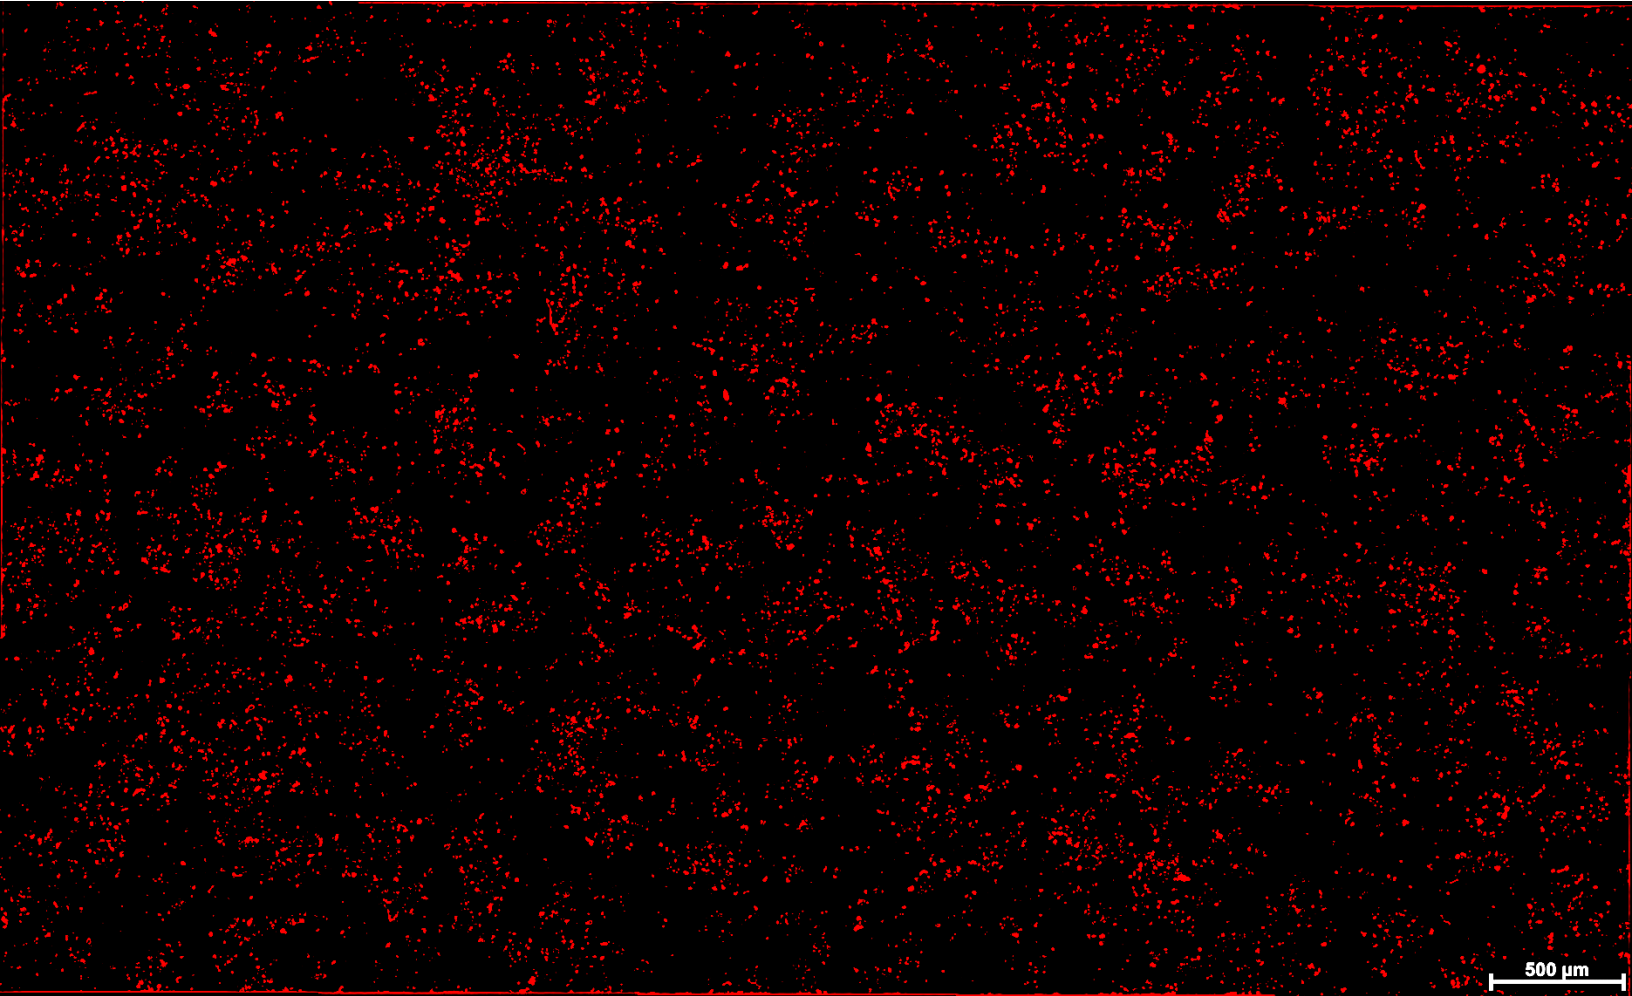

Gating strategy, U251 cell line

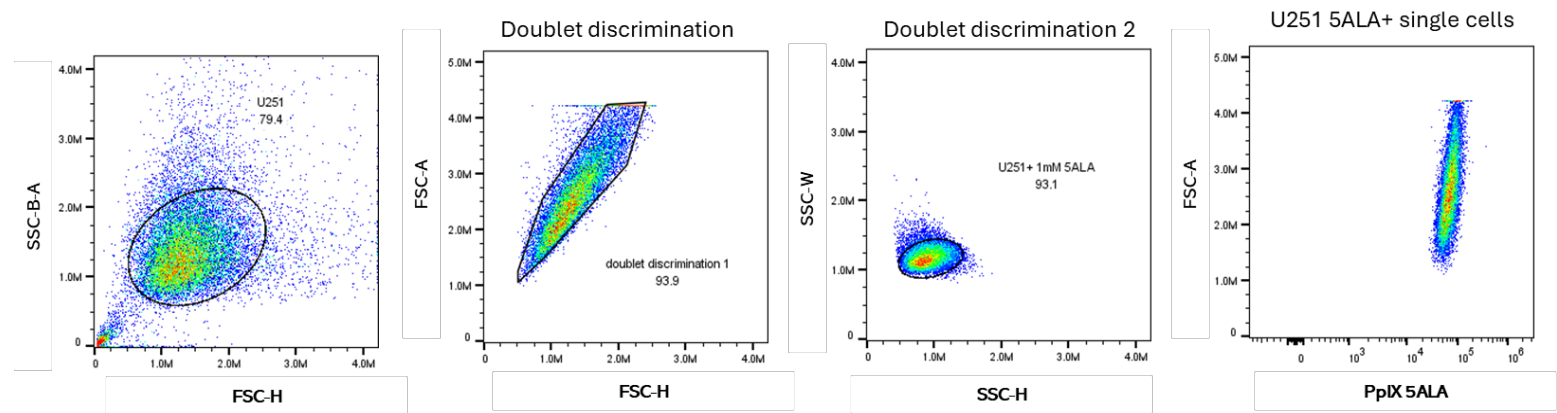

Gating strategy, PT125 glioblastoma

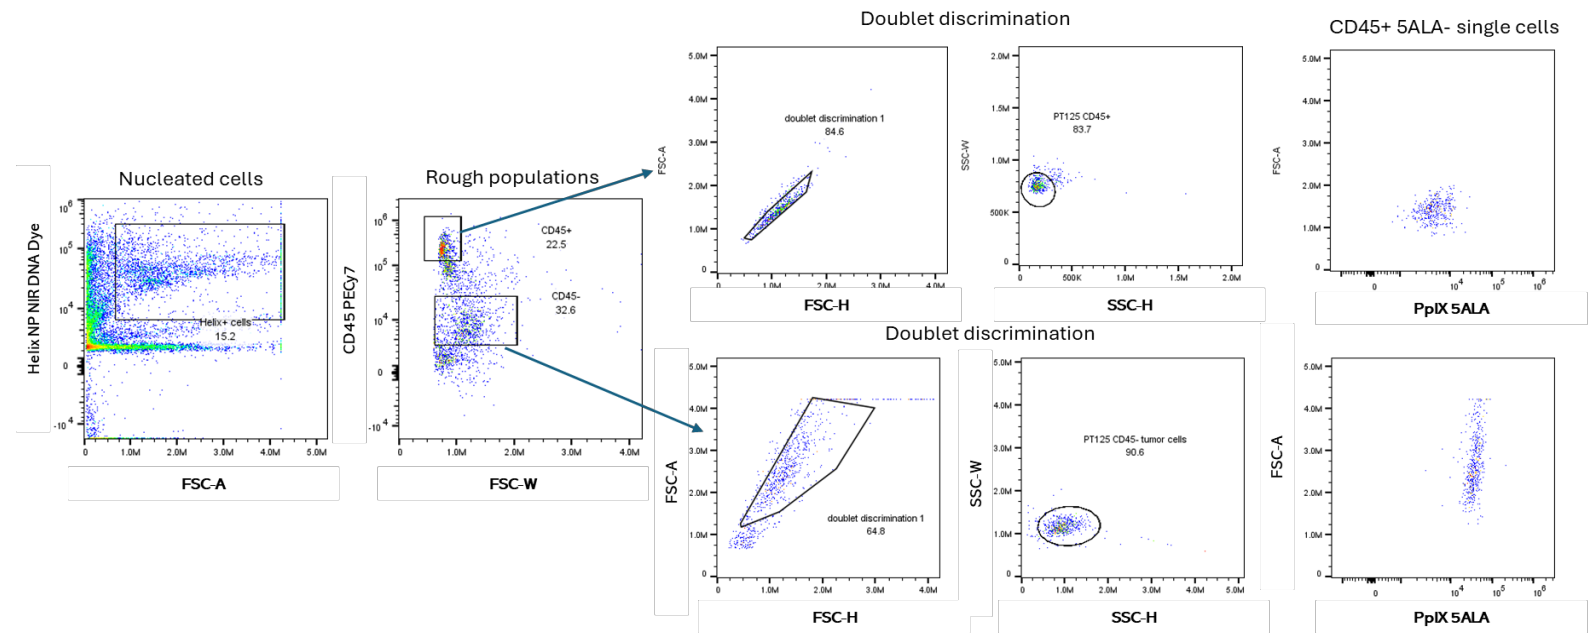

Supplemental Figure 3: Nanopore Karyotypes

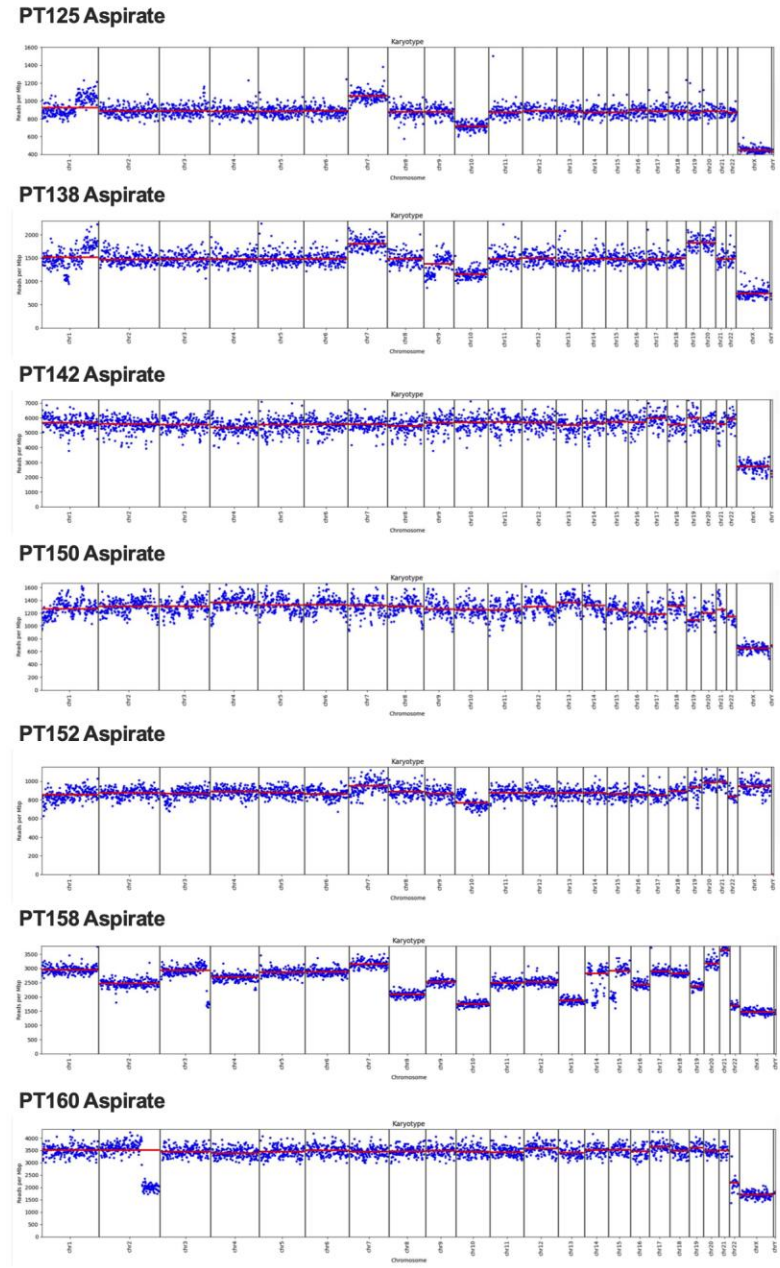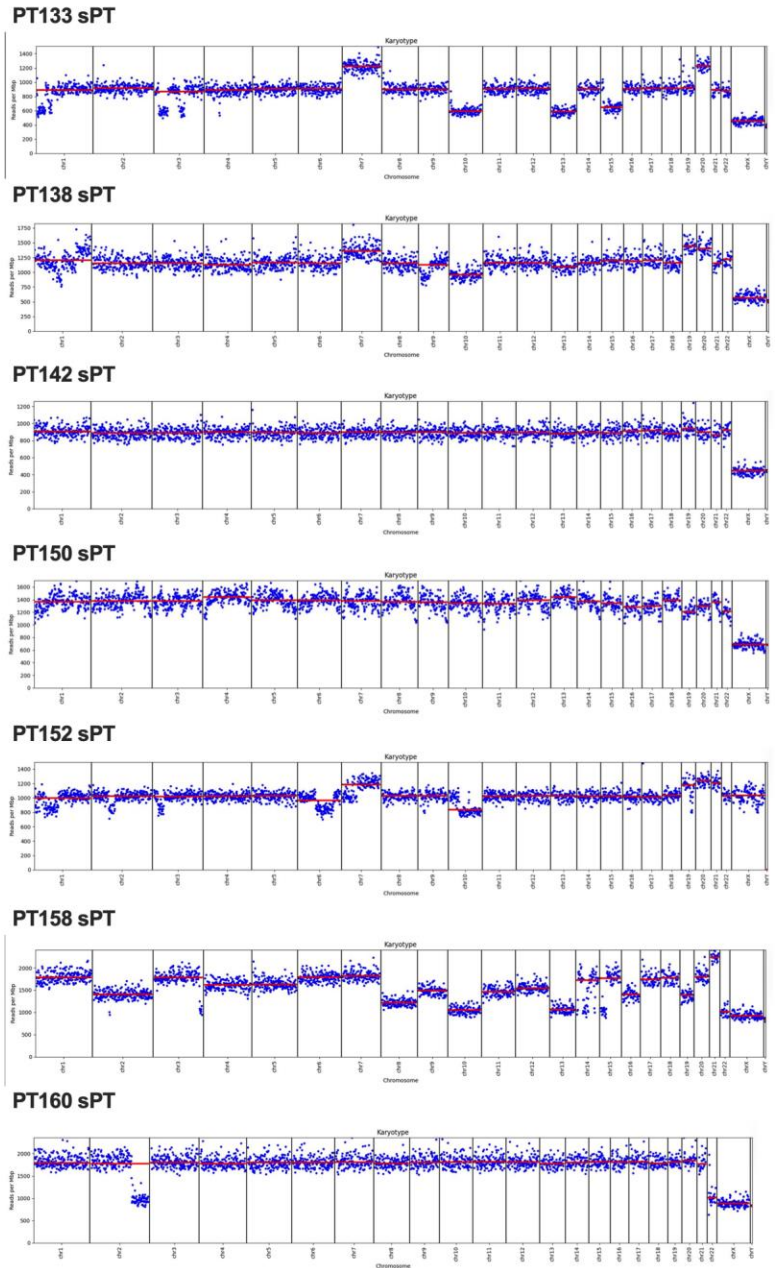

Supplemental Table 2: Nanopore Sequencing Experiment-Wise Downsampling

| Sample    | Mean Sequencing Quality | Individual Bases Aligned | Average Genomic Coverage | Number of Sturgeon CG Sites Used For Classification | Classification                               | Classification Probability | Estimated Tumor Purity | Other Copy Number Alterations | Suspected Chromosome-Level Copy Number Alterations                    |
|-----------|-------------------------|--------------------------|--------------------------|-----------------------------------------------------|----------------------------------------------|----------------------------|------------------------|-------------------------------|-----------------------------------------------------------------------|
| 138 sPT   | 35.6                    | 16,804,587,742           | 7.270x                   | 424449                                              | Mesenchymal Glioblastoma                     | 0.96375                    | 45.85 %                | EGFR Amplification            | +1q, +7, -9p, -10, +19, +20                                           |
| 138 aspir | 37.6                    | 16,812,674,259           | 7.169x                   | 425162                                              | Mesenchymal Glioblastoma                     | 0.97306                    | 39.15 %                | EGFR Amplification            | +1q, +7, -9p, -10, +19, +20                                           |
| 142 sPT   | 12                      | 16,809,030,735           | 7.275x                   | 413841                                              | Posterior Fossa Ependymoma Group A           | 0.99780                    | N/A                    | N/A                           | N/A                                                                   |
| 142 aspir | 31.9                    | 16,819,305,399           | 7.042x                   | 426054                                              | Posterior Fossa Ependymoma Group A           | 0.99958                    | N/A                    | N/A                           | N/A                                                                   |
| 150 sPT   | 38.5                    | 16,804,979,727           | 7.296x                   | 422803                                              | MYC Subtype Atypical Teratoid Rhabdoid Tumor | 0.99857                    | 84.17 %                | Deletion upstream of SMARCB1  | N/A                                                                   |
| 150 aspir | 38.8                    | 16,809,171,416           | 6.988x                   | 422576                                              | MYC Subtype Atypical Teratoid Rhabdoid Tumor | 0.99822                    | 88.89 %                | Deletion upstream of SMARCB1  | N/A                                                                   |
| 152 sPT   | 40.8                    | 16,814,608,178           | 6.834x                   | 424409                                              | Mesenchymal Glioblastoma                     | 0.93908                    | 36.55 %                | EGFR Amplification            | +7q, -10q, +19, +20, +21                                              |
| 152 aspir | 40                      | 16,814,080,785           | 6.766x                   | 424205                                              | Mesenchymal Glioblastoma                     | 0.94791                    | 22.31 %                | EGFR Amplification            | +7, -10q, +19, +20, +21, +X                                           |
| 158 sPT   | 37.7                    | 16,814,209,230           | 6.839x                   | 422855                                              | Mesenchymal Glioblastoma                     | 0.96712                    | 87.83 %                | N/A                           | -2, -4, +7, -8, -9, -10, -11, -12, -13, -15p, -16, -19, +20, +21, -22 |
| 158 aspir | 42.1                    | 16,811,818,147           | 6.906x                   | 424208                                              | Mesenchymal Glioblastoma                     | 0.95245                    | 82.48 %                | N/A                           | -2, -4, +7, -8, -9, -10, -11, -12, -13, -15p, -16, -19, +20, +21, -22 |
| 160 sPT   | 38.7                    | 16,774,054,022           | 6.863x                   | 424456                                              | MYC Subtype Atypical Teratoid Rhabdoid Tumor | 0.99903                    | 90.27 %                | SMARCB1 deletion              | -2q, -22                                                              |
| 160 aspir | 37.8                    | 16,824,111,541           | 6.898x                   | 425021                                              | MYC Subtype Atypical Teratoid Rhabdoid Tumor | 0.99898                    | 79.54 %                | SMARCB1 deletion              | -2q, -22                                                              |

Supplemental Table 3: Nanopore Sequencing Patient-Wise Downsampling

| Sample    | Mean Sequencing Quality | Individual Bases Aligned | Average Genomic Coverage | Number of Sturgeon CG Sites Used For Classification | Classification                               | Classification Probability | Estimated Tumor Purity | Other Copy Number Alterations | Suspected Chromosome-Level Copy Number Alterations                    |
|-----------|-------------------------|--------------------------|--------------------------|-----------------------------------------------------|----------------------------------------------|----------------------------|------------------------|-------------------------------|-----------------------------------------------------------------------|
| 125 aspir | 32.1                    | 12,571,938,283.00        | 5.53x                    | 416187                                              | Mesenchymal Glioblastoma                     | 0.83270                    | 0.3803611738           | TBD                           | +1q, +7, -10                                                          |
| 133 sPT   | 33.3                    | 7,654,025,304.00         | 3.38x                    | 373128                                              | RTK II Glioblastoma                          | 0.93515                    | 0.6779279279           | TBD                           | -1p, +7, -10, -13, -15, +20                                           |
| 138 sPT   | 35.6                    | 29,508,475,046.00        | 12.761x                  | 427597                                              | Mesenchymal Glioblastoma                     | 0.98162                    | 0.450608931            | EGFR Amplification            | +1q, +7, -9p, -10, +19, +20                                           |
| 138 aspir | 37.6                    | 20,574,415,760.00        | 8.776x                   | 426793                                              | Mesenchymal Glioblastoma                     | 0.96807                    | 0.3838209983           | EGFR Amplification            | +1q, +7, -9p, -10, +19, +20                                           |
| 142 sPT   | 12                      | 16,809,030,735.00        | 7.275x                   | 413841                                              | Posterior Fossa Ependymoma Group A           | 0.99780                    | N/A                    | N/A                           | N/A                                                                   |
| 142 aspir | 31.9                    | 63,662,400,145.00        | 26.662x                  | 427823                                              | Posterior Fossa Ependymoma Group A           | 0.99970                    | N/A                    | N/A                           | N/A                                                                   |
| 150 sPT   | 38.5                    | 18,045,458,021.00        | 7.835x                   | 424069                                              | MYC Subtype Atypical Teratoid Rhabdoid Tumor | 0.99857                    | 0.8532110092           | Deletion upstream of SMARCB1  | N/A                                                                   |
| 150 aspir | 38.7                    | 28,922,515,158.00        | 12.028x                  | 427181                                              | MYC Subtype Atypical Teratoid Rhabdoid Tumor | 0.99848                    | 0.8524173028           | Deletion upstream of SMARCB1  | N/A                                                                   |
| 152 sPT   | 40.8                    | 22,886,649,835.00        | 9.303x                   | 427000                                              | Mesenchymal Glioblastoma                     | 0.92693                    | 0.3628741347           | EGFR Amplification            | +7q, -10q, +19, +20, +21                                              |
| 152 aspir | 40                      | 21,235,814,380.00        | 8.551x                   | 426658                                              | Mesenchymal Glioblastoma                     | 0.79445                    | 0.2334827071           | EGFR Amplification            | +7, -10q, +19, +20, +21, +X                                           |
| 158 sPT   | 37.8                    | 40,618,731,758.00        | 16.541x                  | 427584                                              | Mesenchymal Glioblastoma                     | 0.93853                    | 0.8626104024           | N/A                           | -2, -4, +7, -8, -9, -10, -11, -12, -13, -15p, -16, -19, +20, +21, -22 |
| 158 aspir | 42.1                    | 61,051,766,600.00        | 25.080x                  | 427675                                              | Mesenchymal Glioblastoma                     | 0.96932                    | 0.8666666667           | N/A                           | -2, -4, +7, -8, -9, -10, -11, -12, -13, -15p, -16, -19, +20, +21, -22 |
| 160 sPT   | 38.7                    | 58,884,019,618.00        | 24.110x                  | 427602                                              | MYC Subtype Atypical Teratoid Rhabdoid Tumor | 0.99903                    | 0.8787121843           | SMARCB1 deletion              | -2q, -22                                                              |
| 160 aspir | 37.8                    | 65,140,936,906.00        | 26.713x                  | 427756                                              | MYC Subtype Atypical Teratoid Rhabdoid Tumor | 0.99886                    | 0.7470638785           | SMARCB1 deletion              | -2q, -22                                                              |

Supplemental Table 4: Nanopore Sequencing Classification Status

| Sample    | Nanopore Classification                      | Clinical Classification                      | Classification Status      |
|-----------|----------------------------------------------|----------------------------------------------|----------------------------|
| 125 aspir | Mesenchymal Glioblastoma                     | Glioblastoma, IDH-Wild Type, WHO Grade 4     | Molecular Refinement       |
| 133 sPT   | RTK II Glioblastoma                          | Glioblastoma, IDH-Wild Type, WHO Grade 4     | Molecular Refinement       |
| 138 sPT   | Mesenchymal Glioblastoma                     | Glioblastoma, IDH-Wild Type, WHO Grade 4     | Molecular Refinement       |
| 138 aspir | Mesenchymal Glioblastoma                     | Glioblastoma, IDH-Wild Type, WHO Grade 4     | Molecular Refinement       |
| 142 sPT   | Posterior Fossa Ependymoma Group A           | Posterior Fossa Ependymoma Group A           | Matched Clinical Diagnosis |
| 142 aspir | Posterior Fossa Ependymoma Group A           | Posterior Fossa Ependymoma Group A           | Matched Clinical Diagnosis |
| 150 sPT   | MYC Subtype Atypical Teratoid Rhabdoid Tumor | Atypical Teratoid Rhabdoid Tumor WHO Group 4 | Molecular Refinement       |
| 150 aspir | MYC Subtype Atypical Teratoid Rhabdoid Tumor | Atypical Teratoid Rhabdoid Tumor WHO Group 4 | Molecular Refinement       |
| 152 sPT   | Mesenchymal Glioblastoma                     | Glioblastoma, IDH-Wild Type, WHO Grade 4     | Molecular Refinement       |
| 152 aspir | Mesenchymal Glioblastoma                     | Glioblastoma, IDH-Wild Type, WHO Grade 4     | Molecular Refinement       |
| 158 sPT   | Mesenchymal Glioblastoma                     | Glioblastoma, IDH-Wild Type, WHO Grade 4     | Molecular Refinement       |
| 158 aspir | Mesenchymal Glioblastoma                     | Glioblastoma, IDH-Wild Type, WHO Grade 4     | Molecular Refinement       |
| 160 sPT   | MYC Subtype Atypical Teratoid Rhabdoid Tumor | Atypical Teratoid Rhabdoid Tumor WHO Group 4 | Molecular Refinement       |
| 160 aspir | MYC Subtype Atypical Teratoid Rhabdoid Tumor | Atypical Teratoid Rhabdoid Tumor WHO Group 4 | Molecular Refinement       |
